# Supplementary material for: Quantifying the effects of temperature on mosquito and parasite traits that determine the transmission potential of human malaria
Source: PLoS Biol. 2017 Oct 16;15(10):e2003489. doi: 10.1371/journal.pbio.2003489 (PMC5658182; doi:10.1371/journal.pbio.2003489)
Supplement: S9 Table — Nonlinear exponential models used for each block and temperature combination for instances where a decrease in proportion of infectious mosquitoes was observed. Models represent the description of the curve only for data points past the point of truncation (day of peak proportion of infectious mosquitoes) used for binary logistic models. (XLSX) [file pbio.2003489.s014.xlsx]

## Sheet: Sheet1
S9_Table: Nonlinear models for post-truncated data (30ºC, 32ºC, and 34ºC)
Temperature	Block	Model
30ºC	1	1.05 * EXP( -0.08 * day )
30ºC	2	1.37 * EXP( -0.11 * day )
32ºC	1	1.05 * EXP( -0.09 * day )
32ºC	2	2.63 * EXP( -0.18 * day )
34ºC	1	1.85 * EXP( -0.17 * day )
34ºC	2	3.79 * EXP( -0.23 * day )
