# Supplementary material for: Quantifying the effects of temperature on mosquito and parasite traits that determine the transmission potential of human malaria
Source: PLoS Biol. 2017 Oct 16;15(10):e2003489. doi: 10.1371/journal.pbio.2003489 (PMC5658182; doi:10.1371/journal.pbio.2003489)
Supplement: S10 Table — Parameter values (g, k, tm) for best fit model listed for and each block separately. Bolded numbers are predicted values, with 95% confidence intervals in parentheses. (XLSX) [file pbio.2003489.s015.xlsx]

## Sheet: Sheet1
S10_Table: Parameters for binary logistic sporogony model
Block	Temperature	Asymptote (g)	rate (k)	inflection (tm )
1	21ºC	0.40 (0.34 - 0.58)	0.92 (0.45 - 4.19)	14.0 (13.0 - 15.1)
2	21ºC	0.64 (0.50 - 0.93)	0.41 (0.21 - 0.84)	16.1 (14.2 - 20.7)
1	24ºC	0.51 (0.48 - 0.55)	3.52 (1.70 - 6.11)	11.3 (10.9 - 11.7)
2	24ºC	0.70 (0.67 - 0.78)	1.55 (1.02 - 2.44)	11.7 (11.4 - 12.0)
1	27ºC	0.57 (0.55 - 0.60)	1.83 (0.41 - 2.41)	10.9 (9.9 - 11.8)
2	27ºC	0.62 (0.59 - 0.66)	4.58 (0.55 - 9.23)	10.4 (10.0 - 10.8)
1	30ºC	0.43 (0.40 - 0.46)	4.80 (1.92 - 7.87)	8.3 (8.0 - 8.6)
2	30ºC	0.45 (0.31 - 0.53)	2.32 (0.42 - 4.22)	8.3 (7.5 - 9.1)
1	32ºC	0.40 (0.34 - 0.47)	2.37 (1.03 - 4.78)	7.7 (7.1 - 8.2)
2	32ºC	0.42 (0.32 - 0.51)	4.04 (1.24 - 6.84)	7.7 (7.2 - 8.2)
1	34ºC	0.34 (0.30 - 0.38)	2.82 (1.10 - 4.94)	7.0 (6.7 - 7.2)
2	34ºC	0.40 (0.37 - 0.44)	1.95 (1.80 - 3.50)	7.0 (6.9 - 7.1)
