# Supplementary material for: Quantifying the effects of temperature on mosquito and parasite traits that determine the transmission potential of human malaria
Source: PLoS Biol. 2017 Oct 16;15(10):e2003489. doi: 10.1371/journal.pbio.2003489 (PMC5658182; doi:10.1371/journal.pbio.2003489)
Supplement: S16 Table — Comparison of nonlinear models for performance of traits across temperature for the data presented in this paper and the data used in Mordecai et al. 2013. The R2 refers to our empirical data and the corresponding best fit models. (XLSX) [file pbio.2003489.s021.xlsx]

## Sheet: Sheet1
S16_Table: Comparison of thermal performance curve equations between data from this paper and a previously published paper (Mordecai et al. 2013 Ecology Letters)
Parameter	Equation: Mordecai et al.	Equation: Shapiro et al.	R² (Shapiro et al.)
Biting rate (a)			0.996
Vector competence (b)			0.806
Survival (1 - µ)			0.977
Parasite development rate (PDR)			0.978
Extrinsic Incubation Period (EIP)			0.983
